# Supplementary material for: Origins, Importance and Genetic Stability of the Prototype Strains Gilliam, Karp and Kato of Orientia tsutsugamushi
Source: MDPI journal article supplement (doi:10.3390/tropicalmed4020075), 2019-04-30
Supplement: s1 [file s1]

|   |                   | 1 | 2    | 3    | 4    | 5    | 6    |
|---|-------------------|---|------|------|------|------|------|
| 1 | U17257_Karp       | - | 1453 | 1453 | 1453 | 1453 | 1453 |
| 2 | D38623_Karp       | 0 | -    | 1459 | 1459 | 1459 | 1459 |
| 3 | LANM01000019_Karp | 0 | 0    | -    | 1480 | 1480 | 1480 |
| 4 | LYMA02000036_Karp | 0 | 0    | 0    | -    | 1480 | 1480 |
| 5 | LS398548_Karp     | 0 | 0    | 0    | 0    | -    | 1480 |
| 6 | SRX1761260_Karp   | 0 | 0    | 0    | 0    | 0    | -    |

|   |                      | 1 | 2    | 3    | 4    | 5    | 6    |
|---|----------------------|---|------|------|------|------|------|
| 1 | U17256_Gilliam       | - | 1440 | 1457 | 1457 | 1457 | 1457 |
| 2 | L36222_Gilliam       | 0 | -    | 1440 | 1448 | 1448 | 1448 |
| 3 | D38622_Gilliam       | 0 | 0    | -    | 1459 | 1459 | 1459 |
| 4 | LANO01000030_Gilliam | 0 | 0    | 0    | -    | 1501 | 1501 |
| 5 | LS398551_Gilliam     | 0 | 0    | 0    | 0    | -    | 1501 |
| 6 | SRX1761334_Gilliam   | 0 | 0    | 0    | 0    | 0    | -    |

|   |                      | 1 | 2    | 3    | 4    | 5    | 6    |
|---|----------------------|---|------|------|------|------|------|
| 1 | U17258_Kato          | - | 1459 | 1459 | 1459 | 1459 | 1459 |
| 2 | D38624_Kato          | 1 | -    | 1459 | 1459 | 1459 | 1459 |
| 3 | LANN01000025_Kato_PP | 1 | 0    | -    | 1501 | 1501 | 1501 |
| 4 | LY337763_Kato        | 1 | 0    | 0    | -    | 1501 | 1501 |
| 5 | LS398550_Kato        | 1 | 0    | 0    | 0    | -    | 1501 |
| 6 | SRX1761385_kato      | 1 | 0    | 0    | 0    | 0    | -    |

|  |                         |
|--|-------------------------|
|  | pre-genome x pre-genome |
|  | pre-genome x genome     |
|  | genome x genome         |

Supplemental Table 4. Comparison among duplicate sequences of 16S rRNA gene between prototype strains. Above diagonal = length of sequence comparison; below diagonal = number of nucleotide differences between paired sequences.

|                        | 1 | 2    | 3    | 4    | 5    | 6    |
|------------------------|---|------|------|------|------|------|
| 1 U17256_Gilliam       | - | 1440 | 1457 | 1457 | 1457 | 1457 |
| 2 L36222_Gilliam       | 0 | -    | 1440 | 1448 | 1448 | 1448 |
| 3 D38622_Gilliam       | 0 | 0    | -    | 1459 | 1459 | 1459 |
| 4 LANO01000030_Gilliam | 0 | 0    | 0    | -    | 1501 | 1501 |
| 5 LS398551_Gilliam     | 0 | 0    | 0    | 0    | -    | 1501 |
| 6 SRX1761334_Gilliam   | 0 | 0    | 0    | 0    | 0    | -    |

|                     | 1 | 2    | 3    | 4    | 5    | 6    |
|---------------------|---|------|------|------|------|------|
| 1 U17257_Karp       | - | 1453 | 1453 | 1453 | 1453 | 1453 |
| 2 D38623_Karp       | 0 | -    | 1459 | 1459 | 1459 | 1459 |
| 3 LANM01000019_Karp | 0 | 0    | -    | 1480 | 1480 | 1480 |
| 4 LYMA02000036_Karp | 0 | 0    | 0    | -    | 1480 | 1480 |
| 5 LS398548_Karp     | 0 | 0    | 0    | 0    | -    | 1480 |
| 6 SRX1761260_Karp   | 0 | 0    | 0    | 0    | 0    | -    |

|                        | 1 | 2    | 3    | 4    | 5    | 6    |
|------------------------|---|------|------|------|------|------|
| 1 U17258_Kato          | - | 1459 | 1459 | 1459 | 1459 | 1459 |
| 2 D38624_Kato          | 1 | -    | 1459 | 1459 | 1459 | 1459 |
| 3 LANN01000025_Kato_PP | 1 | 0    | -    | 1501 | 1501 | 1501 |
| 4 LY337763_Kato        | 1 | 0    | 0    | -    | 1501 | 1501 |
| 5 LS398550_Kato        | 1 | 0    | 0    | 0    | -    | 1501 |
| 6 SRX1761385_kato      | 1 | 0    | 0    | 0    | 0    | -    |

|  |                         |
|--|-------------------------|
|  | pre-genome x pre-genome |
|  | pre-genome x genome     |
|  | genome x genome         |

Supplementary Table 4. Pairwise comparisons of 16S rRNA gene sequences of *Orientia tsutsugamushi* prototype strains Gilliam, Karp, and Kato maintained in separate laboratories, including gene sequences published in the early 1990's (pre-genome) and complete or near-complete genome sequences (genome).
