# Supplementary material for: Origins, Importance and Genetic Stability of the Prototype Strains Gilliam, Karp and Kato of Orientia tsutsugamushi
Source: MDPI journal article supplement (doi:10.3390/tropicalmed4020075), 2019-04-30
Supplement: s1 [file s1]

|                     | 1 | 2    | 3    | 4    | 5    |
|---------------------|---|------|------|------|------|
| 1 M31887_Karp       | - | 1668 | 1668 | 1668 | 1668 |
| 2 LYMA02000027_Karp | 0 | -    | 1668 | 1668 | 1668 |
| 3 LANM01000016_Karp | 0 | 0    | -    | 1668 | 1668 |
| 4 LS398548_Karp     | 0 | 0    | 0    | -    | 1668 |
| 5 SRX1761260_Karp   | 0 | 0    | 0    | 0    | -    |

|                        | 1 | 2 | 3 | 4 |
|------------------------|---|---|---|---|
| 1 AY191585_Gilliam     | - |   |   |   |
| 2 LANO01000026_Gilliam | 0 | - |   |   |
| 3 LS398551_Gilliam     | 0 | 1 | - |   |
| 4 SRX1761334_Gilliam   | 0 | 1 | 0 | - |

|                        | 1 | 2   | 3    | 4    | 5    |
|------------------------|---|-----|------|------|------|
| 1 AY191586_Kato        | - | 546 | 546  | 546  | 546  |
| 2 JX188393_Kato_GroESL | 2 | -   | 1668 | 1668 | 1668 |
| 3 LANN01000021_Kato    | 2 | 0   | -    | 1668 | 1668 |
| 4 LS398550_Kato        | 2 | 0   | 0    | -    | 1668 |
| 5 SRX1761385_kato      | 2 | 0   | 0    | 0    | -    |

|  |                         |
|--|-------------------------|
|  | pre-genome x pre-genome |
|  | pre-genome x genome     |
|  | genome x genome         |

Supplemental Table 3. Comparison among duplicate sequences of GroEL chaperonin gene between prototype strains. Above diagonal = length of sequence comparison; below diagonal = number of nucleotide differences between paired sequences.

|                        | 1 | 2 | 3 | 4 |
|------------------------|---|---|---|---|
| 1 AY191585_Gilliam     | - |   |   |   |
| 2 LANO01000026_Gilliam | 0 | - |   |   |
| 3 LS398551_Gilliam     | 0 | 1 | - |   |
| 4 SRX1761334_Gilliam   | 0 | 1 | 0 | - |

  

|                     | 1 | 2    | 3    | 4    | 5    |
|---------------------|---|------|------|------|------|
| 1 M31887_Karp       | - | 1668 | 1668 | 1668 | 1668 |
| 2 LYMA02000027_Karp | 0 | -    | 1668 | 1668 | 1668 |
| 3 LANM01000016_Karp | 0 | 0    | -    | 1668 | 1668 |
| 4 LS398548_Karp     | 0 | 0    | 0    | -    | 1668 |
| 5 SRX1761260_Karp   | 0 | 0    | 0    | 0    | -    |

  

|                        | 1 | 2   | 3    | 4    | 5    |
|------------------------|---|-----|------|------|------|
| 1 AY191586_Kato        | - | 546 | 546  | 546  | 546  |
| 2 JX188393_Kato_GroESL | 2 | -   | 1668 | 1668 | 1668 |
| 3 LANN01000021_Kato    | 2 | 0   | -    | 1668 | 1668 |
| 4 LS398550_Kato        | 2 | 0   | 0    | -    | 1668 |
| 5 SRX1761385_kato      | 2 | 0   | 0    | 0    | -    |

  

pre-genome x pre-genome

pre-genome x genome

genome x genome

Supplementary Table 3. Pairwise comparisons of 60-kD GroEL gene sequences of *Orientia tsutsugamushi* prototype strains Gilliam, Karp, and Kato maintained in separate laboratories, including gene sequences published in the early 1990's (pre-genome) and complete or near-complete genome sequences (genome).
