# Supplementary material for: Origins, Importance and Genetic Stability of the Prototype Strains Gilliam, Karp and Kato of Orientia tsutsugamushi
Source: MDPI journal article supplement (doi:10.3390/tropicalmed4020075), 2019-04-30
Supplement: s1 [file s1]

|                              | 1 | 2    | 3    | 4    | 5    |
|------------------------------|---|------|------|------|------|
| 1 M33267-Gilliam             | - | 1575 | 1575 | 1575 | 1575 |
| 2 DQ485289_taiwan_CDCGilliam | 3 | -    | 1575 | 1575 | 1575 |
| 3 LANO01000035_Gilliam       | 0 | 3    | -    | 1575 | 1575 |
| 4 LS398551_Gilliam           | 0 | 3    | 0    | -    | 1575 |
| 5 SRX1761334_Gilliam         | 0 | 3    | 0    | 0    | -    |

|                    | 1 | 2    | 3    | 4    | 5    | 6    | 7    |
|--------------------|---|------|------|------|------|------|------|
| 1 M33004-Karp      | - | 1600 | 1600 | 1600 | 1600 | 1600 | 1600 |
| 2 AY956315-CDCKarp | 7 | -    | 1596 | 1596 | 1596 | 1596 | 1596 |
| 3 AY283180-Karp    | 8 | 4    | -    | 1596 | 1596 | 1596 | 1596 |
| 4 LANM-Karp        | 6 | 2    | 2    | -    | 1596 | 1596 | 1596 |
| 5 LYMA-Karp        | 6 | 2    | 2    | 0    | -    | 1596 | 1596 |
| 6 LS398548 -Karp   | 6 | 2    | 2    | 0    | 0    | -    | 1596 |
| 7 SRX1761389-Karp  | 6 | 2    | 2    | 0    | 0    | 0    | -    |

|                    | 1 | 2    | 3    | 4    | 5    |
|--------------------|---|------|------|------|------|
| 1 M63382-Kato      | - | 1587 | 1587 | 1587 | 1587 |
| 2 AY836148-CDCKato | 2 | -    | 1587 | 1587 | 1587 |
| 3 LANN_Kato PP     | 0 | 2    | -    | 1587 | 1587 |
| 4 LS398550-Kato    | 0 | 2    | 0    | -    | 1587 |
| 5 SRX1761385 Kato  | 0 | 2    | 0    | 0    | -    |

|  |                         |
|--|-------------------------|
|  | pre-genome x pre-genome |
|  | pre-genome x genome     |
|  | genome x genome         |

Supplementary Table 1. Pairwise comparisons of 56-kD TSA gene sequences of *Orientia tsutsugamushi* prototype strains Gilliam, Karp, and Kato maintained in separate laboratories, including gene sequences published in the early 1990's (pre-genome) and complete or near-complete genome sequences (genome).
