# Supplementary material for: Origins, Importance and Genetic Stability of the Prototype Strains Gilliam, Karp and Kato of Orientia tsutsugamushi
Source: MDPI journal article supplement (doi:10.3390/tropicalmed4020075), 2019-04-30
Supplement: s1 [file s1]

- 1 L31933-Gm47-Gilliam
- 2 LS398551\_Gilliam
- 3 SRX477935\_Gilliam
- 4 SRX1761334\_Gilliam

| 1 | 2    | 3    | 4    |
|---|------|------|------|
| - | 1401 | 1401 | 1401 |
| 4 | -    | 1401 | 1401 |
| 4 | 0    | -    | 1401 |
| 4 | 0    | 0    | -    |

- 1 L31934-Kp47
- 2 LS398548\_Karp
- 3 LYMA02000066\_Karp
- 4 LANM01000009\_Karp
- 5 SRX1761260\_Karp

| 1 | 2    | 3    | 4    | 5    |
|---|------|------|------|------|
| - | 1401 | 1401 | 1401 | 1401 |
| 4 | -    | 1401 | 1401 | 1401 |
| 4 | 0    | -    | 1401 | 1401 |
| 4 | 0    | 0    | -    | 1401 |
| 4 | 0    | 0    | 0    | -    |

- 1 L11697-Pkt5-Kato
- 2 HM595492\_Kato\_HtrA\_(htrA)
- 3 HM595493\_Kato\_HtrA\_(htrA)
- 4 LANN01000016\_Kato\_PP
- 5 LS398550\_Kato
- 6 SRX1761385\_kato

| 1 | 2    | 3    | 4    | 5    | 6    |
|---|------|------|------|------|------|
| - | 1401 | 1401 | 1401 | 1401 | 1401 |
| 2 | -    | 1401 | 1401 | 1401 | 1401 |
| 2 | 0    | -    | 1401 | 1401 | 1401 |
| 2 | 0    | 0    | -    | 1401 | 1401 |
| 2 | 0    | 0    | 0    | -    | 1401 |
| 2 | 0    | 0    | 0    | 0    | -    |

|  |                         |
|--|-------------------------|
|  | pre-genome x pre-genome |
|  | pre-genome x genome     |
|  | genome x genome         |

Supplementary Table 2. Pairwise comparisons of 47-kD HtrA gene sequences of *Orientia tsutsugamushi* prototype strains Gilliam, Karp, and Kato maintained in separate laboratories, including gene sequences published in the early 1990's (pre-genome) and complete or near-complete genome sequences (genome).
